# Supplementary material for: Experimental search for high-temperature ferroelectric perovskites guided by two-step machine learning
Source: PubMed Central journal article supplement (PMC5920103; doi:10.1038/s41467-018-03821-9), 2018-04-26
Supplement: 41467_2018_3821_MOESM1_ESM.pdf [file 41467_2018_3821_MOESM1_ESM.pdf]

## Experimental search for high-temperature ferroelectric perovskites guided by two-step machine learning

Prasanna V. Balachandran,<sup>1, a)</sup> Benjamin Kowalski,<sup>2</sup> Alp Sehirlioglu,<sup>2, b)</sup> and Turab Lookman<sup>1, c)</sup>

<sup>1)</sup> *Theoretical Division, Los Alamos National Laboratory, Los Alamos, NM 87545, USA.*

<sup>2)</sup> *Department of Materials Science and Engineering, Case Western Reserve University, Cleveland, OH 44106, USA.*

(Dated: 28 February 2018)

---

a) Electronic mail: [pvb5e@virginia.edu](mailto:pvb5e@virginia.edu)

b) Electronic mail: [axs461@case.edu](mailto:axs461@case.edu)

c) Electronic mail: [txl@lanl.gov](mailto:txl@lanl.gov)

**Supplementary Table 1** | Ionic displacements ( $\delta$ , in Å) for the Me-cations listed in the table were taken from the work of Balachandran *et al.*<sup>1</sup> For  $\text{Pb}^{2+}$  and  $\text{Bi}^{3+}$ , the values for  $\delta$  were taken to be 0.45 and 0.80 Å, respectively,<sup>2</sup> from the literature.

| Me-cation        | Ionic Displacements ( $\delta$ , in Å) |
|------------------|----------------------------------------|
| $\text{Mg}^{2+}$ | 0.084                                  |
| $\text{Ni}^{2+}$ | 0.081                                  |
| $\text{Zn}^{2+}$ | 0.233                                  |
| $\text{Fe}^{3+}$ | 0.169                                  |
| $\text{In}^{3+}$ | 0.088                                  |
| $\text{Mn}^{3+}$ | 0.131                                  |
| $\text{Sc}^{3+}$ | 0.109                                  |
| $\text{Yb}^{3+}$ | 0.081                                  |
| $\text{Al}^{3+}$ | 0.109                                  |
| $\text{Co}^{3+}$ | 0.178                                  |
| $\text{Cr}^{3+}$ | 0.127                                  |
| $\text{Ga}^{3+}$ | 0.095                                  |
| $\text{Lu}^{3+}$ | 0.077                                  |
| $\text{Ti}^{4+}$ | 0.169                                  |
| $\text{Zr}^{4+}$ | 0.131                                  |
| $\text{Hf}^{4+}$ | 0.129                                  |
| $\text{Sn}^{4+}$ | 0.108                                  |
| $\text{Nb}^{5+}$ | 0.169                                  |
| $\text{Ta}^{5+}$ | 0.169                                  |
| $\text{Sb}^{5+}$ | 0.132                                  |
| $\text{Bi}^{5+}$ | 0.134                                  |
| $\text{Mo}^{6+}$ | 0.107                                  |
| $\text{W}^{6+}$  | 0.101                                  |

## Supplementary Note 1

Our first iteration based on the recommendations from the classification learning and EGO method led to the  $0.6\text{Bi}(\text{Sc}_{0.17}\text{Ga}_{0.83})\text{O}_3-0.4\text{PT}$  composition and its predicted  $\widehat{T}_C$  was equal to  $747 \pm 223$  K. However, our XRD measurements did not reveal a pure perovskite phase. We augmented our classification learning dataset (shown as D1 in Figure 2 in the main manuscript) with this composition and assigned it a  $-1$  label. We then retrained our  $\text{SVC}_{\text{rbf}}$  classifiers.

In the second iteration, the EGO method recommended  $0.35\text{Bi}(\text{In}_{0.31}\text{Sc}_{0.69})\text{O}_3-0.65\text{PT}$ , whose predicted  $\widehat{T}_C$  was  $923 \pm 343$  K. Our XRD measurements revealed a pure perovskite phase and we measured its  $T_C$  to be 733 K. During this step, we also considered compositions in the  $\text{Bi}(\text{ScGa})\text{O}_3\text{-PT}$  pseudo-ternary phase space, which were unsuccessfully predicted by ML in the first iteration. The most promising composition, *i.e.*, the one down-selected by the  $\text{SVC}_{\text{rbf}}$  classifier and recommended by EGO, was identified as  $0.5\text{Bi}(\text{Sc}_{0.56}\text{Ga}_{0.44})\text{O}_3-0.5\text{PT}$ , whose predicted  $\widehat{T}_C$  was  $846 \pm 229$  K. Our XRD measurements revealed that this composition still contained secondary phases. We augmented our classification learning dataset with these two compositions, namely  $0.35\text{Bi}(\text{In}_{0.31}\text{Sc}_{0.69})\text{O}_3-0.65\text{PT}$  and  $0.5\text{Bi}(\text{Sc}_{0.56}\text{Ga}_{0.44})\text{O}_3-0.5\text{PT}$  with the labels  $+1$  and  $-1$ , respectively. Our regression dataset (shown as D2 in Figure 2 in the main manuscript) was augmented with only the  $0.35\text{Bi}(\text{In}_{0.31}\text{Sc}_{0.69})\text{O}_3-0.65\text{PT}$  perovskite composition, whose measured  $T_C$  was 733 K. We retrained both  $\text{SVC}_{\text{rbf}}$  and  $\text{SVR}_{\text{rbf}}$  models with the inclusion of these new data points.

After the second iteration, Kowalski and Sehriroglu<sup>3</sup> shared XRD and dielectric measurement results for 13 new compositions that were not originally present in our training datasets: 12 in the  $\text{BiScO}_3\text{-BiInO}_3\text{-PbTiO}_3$  (the  $\text{BiInO}_3$  content was  $< 15\%$ ) and one in the  $\text{BiScO}_3\text{-BiGaO}_3\text{-PbTiO}_3$  composition space. The XRD measurements revealed that all  $\text{BiScO}_3\text{-BiInO}_3\text{-PbTiO}_3$  compositions formed in the perovskite phase and we augmented the classification learning dataset with these compositions and assigned  $+1$  label to each of them. Similarly, we also augmented the regression dataset with the  $T_C$  data for these 12 compositions. In the case of  $\text{BiScO}_3\text{-BiGaO}_3\text{-PbTiO}_3$ , XRD revealed secondary phases and therefore, it was assigned a  $-1$  label. Note that none of these compositions were recommended by hierarchical learning. The XRD data for the 13 compositions and the dielectric measurements data for the 12 perovskite compositions are given in the Supplementary Figure 1.

In the third iteration, our EGO algorithm recommended  $0.25\text{Bi}(\text{Sc}_{0.47}\text{Ga}_{0.53})\text{O}_3-0.75\text{PT}$  whose  $\widehat{T}_C$  was  $778 \pm 135$  K. The XRD data revealed pure perovskite phase and we measure its  $T_C$  as 798 K, in excellent agreement with our predicted  $\widehat{T}_C$  value. In the third iteration, we also synthesized the  $0.7\text{Bi}(\text{Fe}_{0.73}\text{Co}_{0.27})\text{O}_3-0.3\text{PT}$  composition, which had the maximum  $\widehat{T}_C$  ( $929 \pm 94$  K) in the unexplored composition space. We identify this as an interesting composition, because the  $\{\text{FeCo}\}$  pair do not exist either in the classification learning or regression datasets. This pair is also not explored in the literature. However, the XRD data revealed presence of secondary phases. Thus, we augmented our classification learning dataset with  $0.25\text{Bi}(\text{Sc}_{0.47}\text{Ga}_{0.53})\text{O}_3-0.75\text{PT}$  and  $0.7\text{Bi}(\text{Fe}_{0.73}\text{Co}_{0.27})\text{O}_3-0.3\text{PT}$  and assigned  $+1$  and  $-1$  labels, respectively. We also augmented the regression dataset with  $0.25\text{Bi}(\text{Sc}_{0.47}\text{Ga}_{0.53})\text{O}_3-0.75\text{PT}$ , whose measured  $T_C$  was 798 K.

In the fourth iteration, the EGO algorithm recommended  $0.4\text{Bi}(\text{Fe}_{0.19}\text{Sc}_{0.81})\text{O}_3-0.6\text{PT}$  with a predicted  $\widehat{T}_C$  of  $749 \pm 161$  K. Similarly, the  $0.2\text{Bi}(\text{Fe}_{0.12}\text{Co}_{0.88})\text{O}_3-0.8\text{PT}$  solid solution had the maximum  $\widehat{T}_C$  ( $815 \pm 24$  K) in the unexplored space. Our XRD measurements revealed that both compositions formed in the pure perovskite phase. The measured  $T_C$  for  $0.4\text{Bi}(\text{Fe}_{0.19}\text{Sc}_{0.81})\text{O}_3-0.6\text{PT}$  and  $0.2\text{Bi}(\text{Fe}_{0.12}\text{Co}_{0.88})\text{O}_3-0.8\text{PT}$  were found to be 728 and 898 K, respectively. We augmented our classification learning and regression datasets with  $+1$  labels and  $T_C$  data, respectively, for both  $0.4\text{Bi}(\text{Fe}_{0.19}\text{Sc}_{0.81})\text{O}_3-0.6\text{PT}$  and  $0.2\text{Bi}(\text{Fe}_{0.12}\text{Co}_{0.88})\text{O}_3-0.8\text{PT}$  compositions.

In the fifth iteration, the top two recommendations from the EGO algorithm include,  $0.3\text{Bi}(\text{Yb}_{0.44}\text{Al}_{0.56})\text{O}_3-0.7\text{PT}$  and  $0.3\text{Bi}(\text{Ni}_{0.50}\text{Sn}_{0.50})\text{O}_3-0.7\text{PT}$  and its predicted  $\widehat{T}_C$  values were  $801 \pm 125$  and  $780 \pm 123$  K, respectively. In this iteration, we decided to study two compositions from EGO because they belonged to two novel  $\{\text{Me}'\text{Me}''\}$  pairs that are also not explored in the literature. On the other hand,  $0.2\text{Bi}(\text{Co}_{0.90}\text{Al}_{0.10})\text{O}_3-0.8\text{PT}$  had the maximum predicted  $\widehat{T}_C$  value of  $843 \pm 33$  K and the  $\{\text{CoAl}\}$  pair is also not explored in the literature. The XRD measurements revealed that the  $0.3\text{Bi}(\text{Yb}_{0.44}\text{Al}_{0.56})\text{O}_3-0.7\text{PT}$  had secondary phases. On the other hand, a pure perovskite phase was found in the  $0.3\text{Bi}(\text{Ni}_{0.50}\text{Sn}_{0.50})\text{O}_3-0.7\text{PT}$  and  $0.2\text{Bi}(\text{Co}_{0.90}\text{Al}_{0.10})\text{O}_3-0.8\text{PT}$  compositions. The  $T_C$  data for  $0.3\text{Bi}(\text{Ni}_{0.50}\text{Sn}_{0.50})\text{O}_3-0.7\text{PT}$  and  $0.2\text{Bi}(\text{Co}_{0.90}\text{Al}_{0.10})\text{O}_3-0.8\text{PT}$  compositions were measured as 658 and 883 K, respectively. The XRD and dielectric measurements data are given in Figures 4 and 5 in the main manuscript.

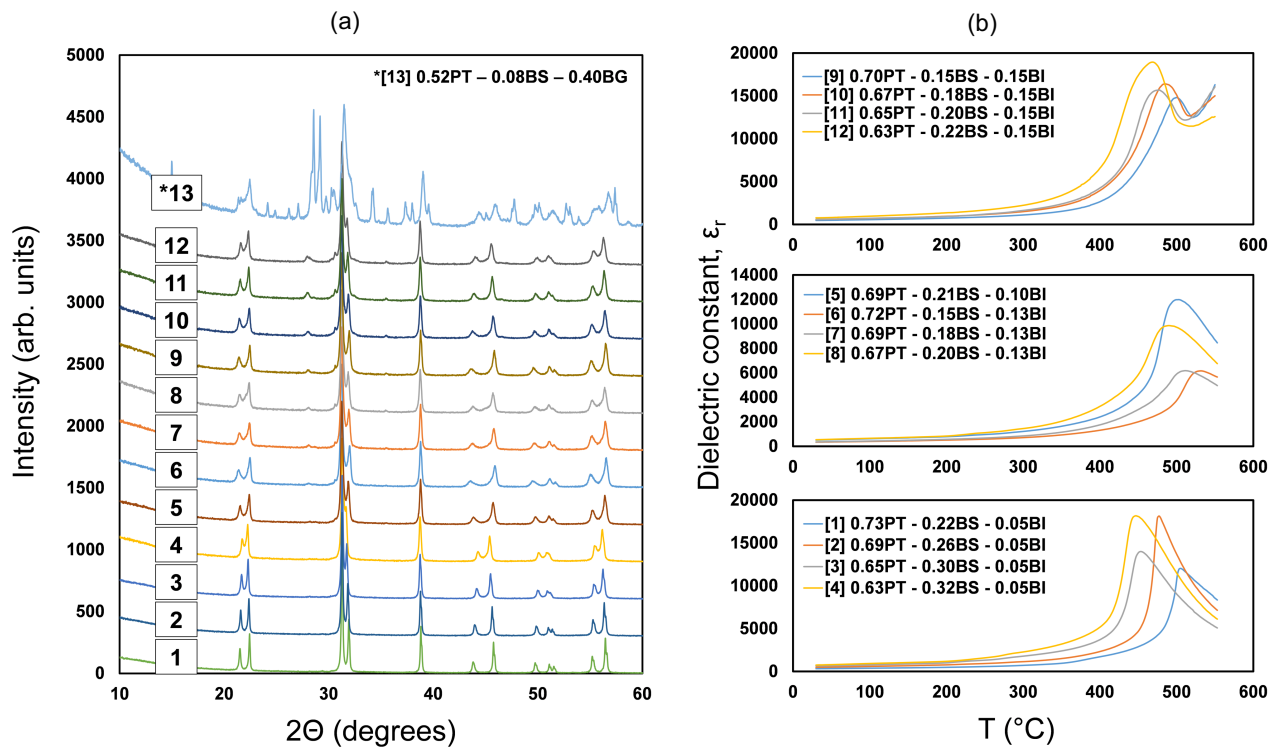

**Supplementary Figure 1 | X-ray diffraction and dielectric measurements data.** (a) XRD data for 13 compositions. Compositions 1 to 12 correspond to that of the  $\text{PbTiO}_3$  (PT)- $\text{BiScO}_3$  (BS)- $\text{BiInO}_3$  (BI) system, whereas composition 13 corresponds to that of the PT-BS- $\text{BiGaO}_3$  (BG) pseudo-ternary space. All 12 PT-BS-BI compositions were identified to be perovskite, however the PT-BS-BG composition has secondary phases and therefore not labeled as a perovskite (identified with an asterisk symbol, \*). (b) Dielectric data measured at 10 kHz frequency as a function of temperature ( $T$ ,  $^{\circ}\text{C}$ ) for the 12 PT-BS-BI compositions.

## Supplementary References

- <sup>1</sup>P. V. Balachandran, T. Shearman, J. Theiler, and T. Lookman, *Acta. Cryst. B* **73**, 962 (2017).
- <sup>2</sup>I. Grinberg and A. M. Rappe, *Phase Transitions* **80**, 351 (2007).
- <sup>3</sup>B. Kowalski and A. Sehirlioglu, Private Communication.
